# Supplementary material for: Antibiograms in five pipetting steps: precise dilution assays in sub-microliter volumes with a conventional pipette
Source: Royal Society of Chemistry journal article supplement (doi:10.1039/c5lc01151e), 2016-01-01
Supplement: c5lc01151e1.pdf [file c5lc01151e1.pdf]

## Supporting Information

### Antibiograms in five pipetting steps: precise dilution assays in sub microliter volumes with a conventional pipette

Ladislav Derzsi,<sup>‡a,b</sup> Tomasz S. Kaminski<sup>‡a</sup> and Piotr Garstecki<sup>\*a</sup>

a - Institute of Physical Chemistry, Polish Academy of Sciences, Kasprzaka 44/52, 01-224 Warsaw, Poland, E-mail: garst@ichf.edu.pl

b - University of Padova, Department of Physics and Astronomy, Via Marzolo 8, 35131 Padova, Italy

<sup>‡</sup> equal contribution.

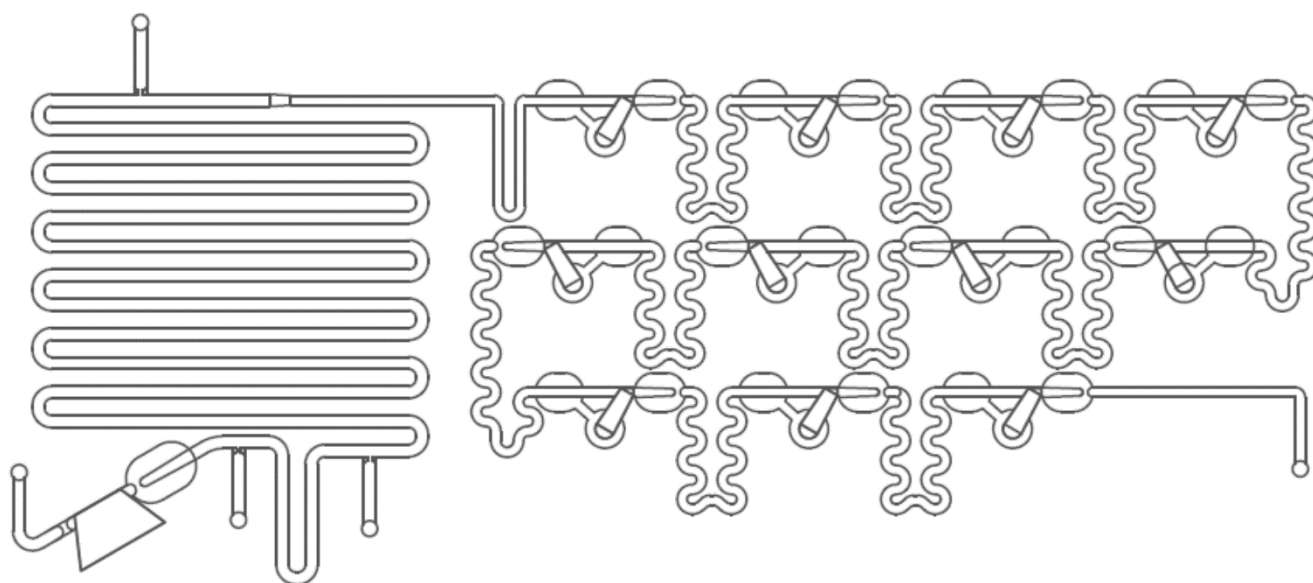

Fig. S1. Schematics of the microfluidic chip that we used for preparation of the gradient and determination of MIC.

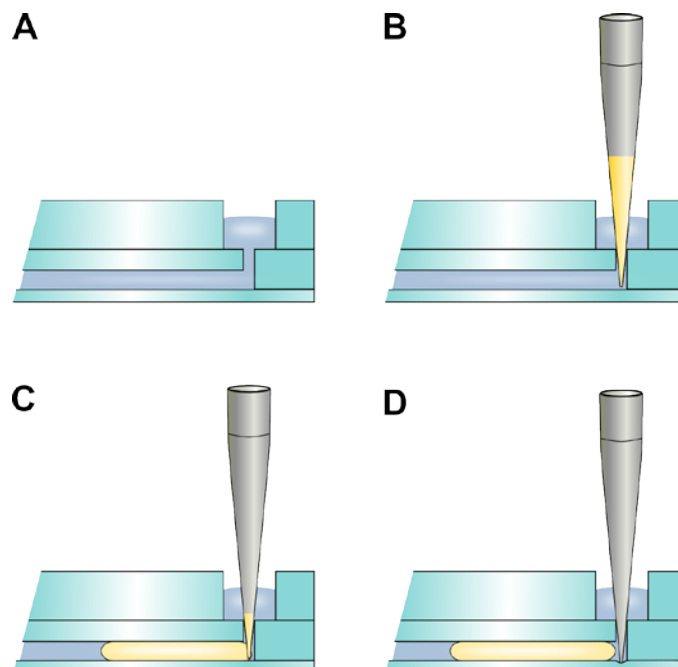

Fig.S2. A scheme depicting process of deposition of a sample into microfluidic channel with a automatic pipette.

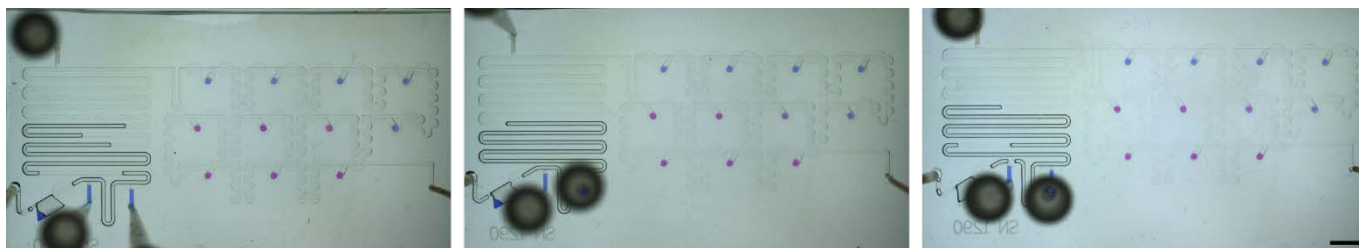

Fig.S3. Snapshots of 3 different chips depicting results of bubble formation during incubation. Scale bar is 5 mm.

I. Metering of 2  $\mu$ L droplet

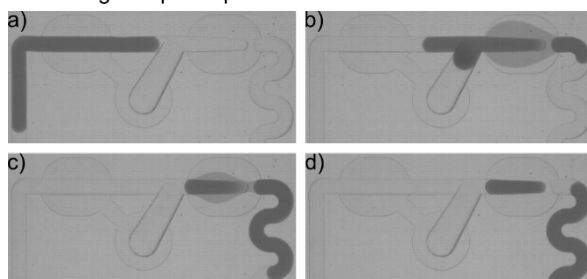

II. Metering of 7  $\mu$ L droplet

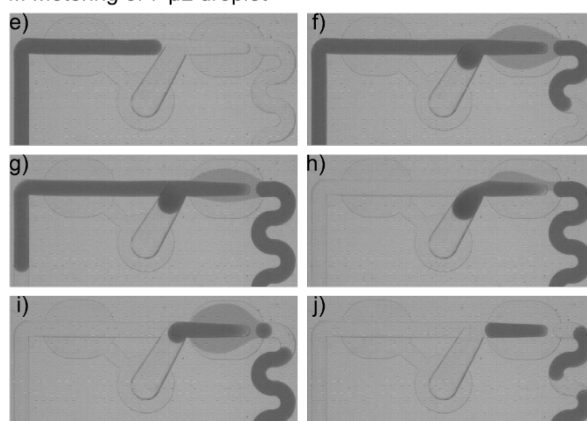

Fig. S4. Snapshots depicting the metering of small (a-d) and large (e-j) plugs . The large 7  $\mu$ L plug breaks before it flows entirely through the metering trap.
